# Supplementary material
Source: PubMed Central journal article supplement (PMC3597741)
Supplement: NIHMS449441-supplement-Supplementary_Figure_1.pdf [file NIHMS449441-supplement-Supplementary_Figure_1.pdf]

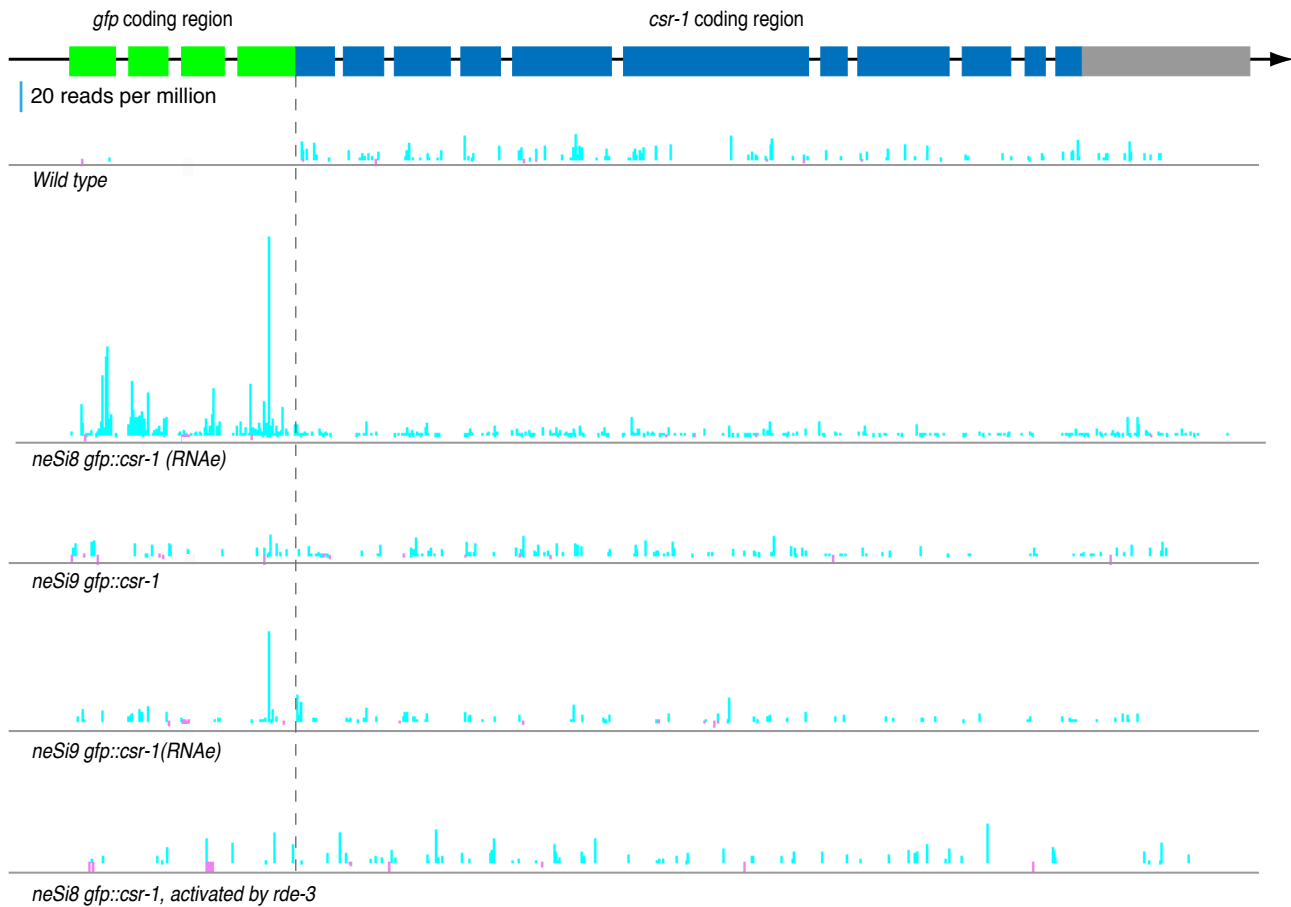

### Figure S1. Small RNA profile of *gfp::csr-1* transgenic lines, related to Figure 3

Small RNA density along the *gfp* and *cdk-1* coding regions of wild-type and indicated transgenic lines. Vertical bars represent the 5' nt of a small RNA, and the height of each bar indicates the number of reads that start at that position. The strand is represented by color; sense (pink) and antisense (light blue). Scale bar indicates 20 reads per million. The strain *neSi9 gfp::csr-1 (RNAe)* (GFP-) was generated by crossing *neSi9 gfp::csr-1* (GFP+) to *neSi10 gfp::csr-1 (RNAe)* (GFP-). The strain *neSi8 gfp::csr-1* (GFP+) was generated by crossing an *rde-3* mutation into the strain *neSi8 gfp::csr-1 (RNAe)* (GFP-) and then removing the *rde-3* mutation by crossing *rde-3; neSi8 gfp::csr-1* to a wild-type strain.
