# Supplementary material
Source: PubMed Central journal article supplement (PMC3597741)
Supplement: NIHMS449441-supplement-Supplementary_Table_1.pdf [file NIHMS449441-supplement-Supplementary_Table_1.pdf]

**Table S1**

|        |                                                                                                                                   |
|--------|-----------------------------------------------------------------------------------------------------------------------------------|
| EG4322 | <i>Mos1(ttTi5605) II; unc-119(ed3) III</i>                                                                                        |
| EG5003 | <i>unc-119(ed3) III; Mos1(cxTi10882) IV</i>                                                                                       |
| WM189  | <i>avr-14(ad1302) I; Mos1(tTTi5605) II; unc-119 (ed3) III; glc-1(pk54::Tc1)<br/>avr-15(ad1051) V</i>                              |
| WM238  | <i>neSi8 [gfp::csr-1(RNAe), cb-unc-119(+)] II; unc-119(ed3) III.</i>                                                              |
| WM239  | <i>neSi9 [gfp::csr-1, cb-unc-119(+)] II; unc-119(ed3) III.</i>                                                                    |
| WM240  | <i>neSi10 [gfp::csr-1(RNAe), cb-unc-119(+)] IV; unc-119(ed3) III.</i>                                                             |
| WM241  | <i>neSi11 [gfp::cdk-1(RNAe), cb-unc-119(+)] II; unc-119(ed3) III.</i>                                                             |
| WM242  | <i>neSi12 [cdk-1::gfp, cb-unc-119(+)] II; unc-119(ed3) III.</i>                                                                   |
| WM269  | <i>neSi13 [gfp::cdk-1, cb-unc-119(+)] II; prg-1(tm872) I; unc-119(ed3) III.</i>                                                   |
| WM243  | <i>neSi14 [cdk-1::gfp(RNAe), cb-unc-119(+)] II; unc-119(ed3) III.</i>                                                             |
| WM247  | <i>neSi8 [gfp::csr-1(RNAe), cb-unc-119(+)] II; hcp-6(mr17) I.</i>                                                                 |
| WM248  | <i>neSi11 [gfp::cdk-1(RNAe), cb-unc-119(+)] II; hcp-6(mr17) I.</i>                                                                |
| WM249  | <i>neSi8 [gfp::csr-1(RNAe), cb-unc-119(+)] II; rde-3(ne3370) I.</i>                                                               |
| WM250  | <i>neSi11 [gfp::cdk-1(RNAe), cb-unc-119(+)] II; rde-3(ne3370) I.</i>                                                              |
| WM251  | <i>neSi8 [gfp::csr-1(RNAe), cb-unc-119(+)] II; rde-1(ne300) V.</i>                                                                |
| WM252  | <i>neSi11 [gfp::cdk-1(RNAe), cb-unc-119(+)] II; rde-1(ne300) V.</i>                                                               |
| WM253  | <i>neSi8 [gfp::csr-1(RNAe), cb-unc-119(+)] II; mes-3(bn35) dpy-5(e61) I / hT2<br/>[bli-4(e937) let-?(q782) qIs48] (I; III)</i>    |
| WM254  | <i>neSi11 [gfp::cdk-1(RNAe), cb-unc-119(+)] II; mes-3(bn35) dpy-5(e61) I /<br/>hT2 [bli-4(e937) let-?(q782) qIs48] (I; III) .</i> |
| WM255  | <i>neSi8 [gfp::csr-1(RNAe), cb-unc-119(+)] II; dpy-11(e224) mes-4(bn23)<br/>unc-76(e911)V/hT1[unc-?(n754) let-?](IV;V).</i>       |

- WM256 *neSi11 [gfp::cdk-1(RNAe), cb-unc-119(+)] II; dpy-11(e224) mes-4(bn23) unc-76(e911)V/nT1[unc-?(n754) let-?](IV;V).*
- WM257 *neSi8 [gfp::csr-1(RNAe), cb-unc-119(+)] II; unc-32 mut-7(ne4255)III.*
- WM258 *neSi11 [gfp::cdk-1(RNAe), cb-unc-119(+)] II; unc-32 mut-7(ne4255)III.*
- WM259 *neSi8 [gfp::csr-1(RNAe), cb-unc-119(+)] II; hpl-1(tm16224) X.*
- WM260 *neSi11 [gfp::cdk-1(RNAe), cb-unc-119(+)] II; hpl-1(tm16224) X.*
- WM261 *neSi8 [gfp::csr-1(RNAe), cb-unc-119(+)] II; hpl-2 (tm1489) III; hpl-1(tm16224) X.*
- WM262 *neSi11 [gfp::cdk-1(RNAe), cb-unc-119(+)] II; hpl-2 (tm1489) III; hpl-1(tm16224) X.*
- WM263 *neSi8 [gfp::csr-1(RNAe), cb-unc-119(+)] II; hpl-2 (tm1489) III.*
- WM264 *neSi11 [gfp::cdk-1(RNAe), cb-unc-119(+)] II; hpl-2 (tm1489) III.*
- WM265 *neSi8 [gfp::csr-1(RNAe), cb-unc-119(+)] II; wago-1(tm1414) I.*
- WM266 *neSi11 [gfp::cdk-1(RNAe), cb-unc-119(+)] II; wago-1(tm1414) I.*
- WM246 *neSi8 [gfp::csr-1(RNAe), cb-unc-119(+)] II; nrde-3(tm1116) X.*
- WM244 *neSi11 [gfp::cdk-1(RNAe), cb-unc-119(+)] II; wago-9(tm1200) dpy-17(e164) III.*
- WM245 *neSi8 [gfp::csr-1(RNAe), cb-unc-119(+)] II; wago-9(tm1200) dpy-17(e164) III.*
- WM267 *neSi11 [gfp::cdk-1(RNAe), cb-unc-119(+)] II; wago-1(tm1414) I; wago-9(tm1200) dpy-17(e164) III.*
- WM268 *neSi11 [gfp::cdk-1(RNAe), cb-unc-119(+)] II; wago-9(tm1200) dpy-17(e164) III; wago-10(tm1186) V.*
- WM270 *neSi8 [gfp::csr-1(RNAe), cb-unc-119(+)] II; unc-24(e138) tels1[oma-1::gfp, unc-119(+)] IV.*
- WM271 *neSi11 [gfp::cdk-1(RNAe), cb-unc-119(+)] II; unc-24(e138) tels1[oma-1::gfp, unc-119(+)] IV.*

- WM272 *neSi11[gfp::cdk-1 (RNAe), cb-unc-119(+)] II; nels2[worm-1::gfp, rol-6(su1006)]*
- WM273 *neSi14[cdk-1::gfp(RNAe), cb-unc-119(+)] II; nels2[worm-1::gfp, rol-6(su1006)]*
- WM274 *neSi8 [gfp::csr-1(RNAe), cb-unc-119(+)] II; met-1(n4337) I/hT2[bli-4(e937) let-?(q782) q/s48] (I;III); met-2(n4256) III/hT2[bli-4(e937) let-?(q782) q/s48] (I;III)*
